# Supplementary material for: MHC class II expression and potential antigen-presenting cells in the retina during experimental autoimmune uveitis
Source: Springer Nature journal article supplement (doi:10.1186/s12974-017-0915-5), 2017-07-18

A.

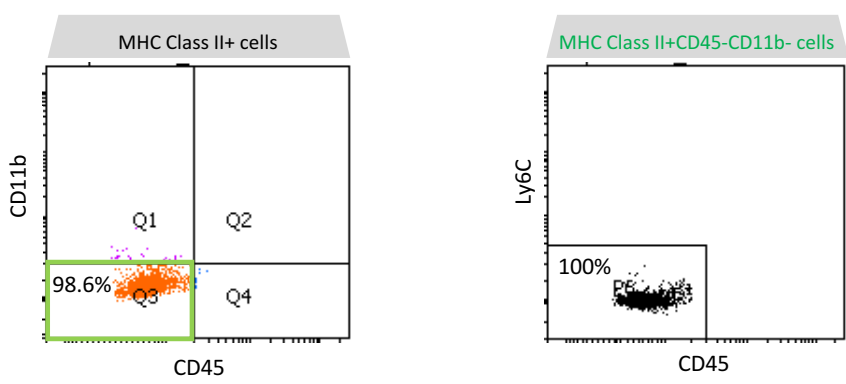

B.

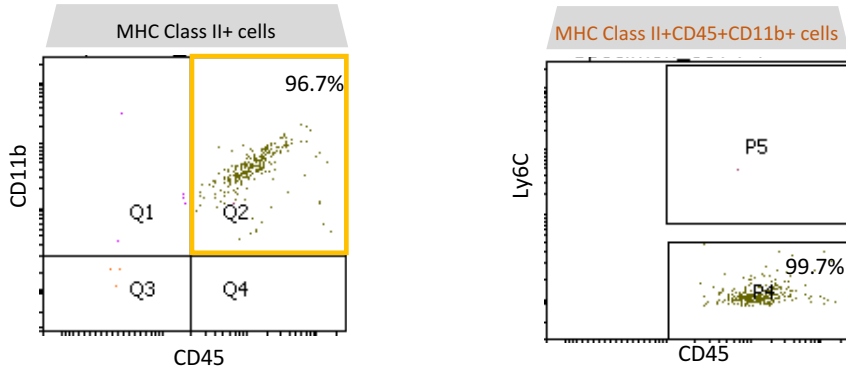

C.

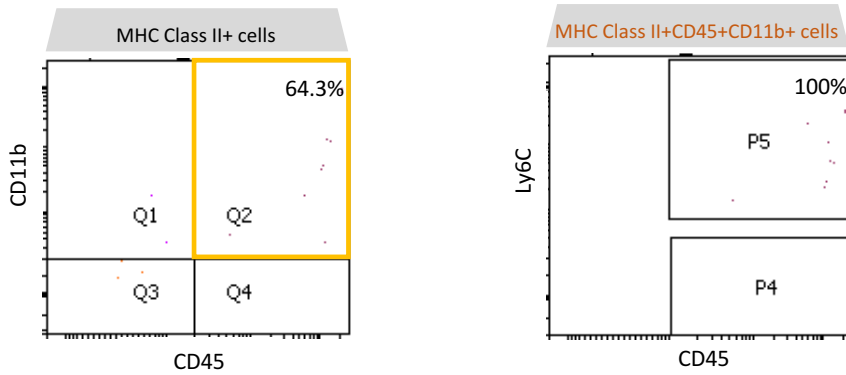

Supplement: MOESM2 [file 13310030]
